# Supplementary material
Source: PubMed Central journal article supplement (PMC4249347)
Supplement: IAI.01514-14_zii999090947so1.pdf [file IAI.01514-14_zii999090947so1.pdf]

1 Table S1. Isolation of *L. monocytogenes* in fecal samples of pregnant and non-pregnant gerbils  
 2 during the 6 post-treatment days (PTD).

3

| <b>Pregnant animals</b>     |                          |                        |                        |                        |                        |                        |                          |
|-----------------------------|--------------------------|------------------------|------------------------|------------------------|------------------------|------------------------|--------------------------|
| <b>Dose</b>                 | <b>PTD 1</b>             | <b>PTD 2</b>           | <b>PTD 3</b>           | <b>PTD 4</b>           | <b>PTD 5</b>           | <b>PTD 6</b>           | <b>Total</b>             |
| <b>(CFU)</b>                | <b>(%)<sup>a,b</sup></b> | <b>(%)<sup>a</sup></b> | <b>(%)<sup>a</sup></b> | <b>(%)<sup>a</sup></b> | <b>(%)<sup>a</sup></b> | <b>(%)<sup>a</sup></b> | <b>(%)<sup>a</sup></b>   |
| Control                     | 0/4 (0) <sup>A</sup>     | 0/4 (0) <sup>A</sup>   | 0/4 (0) <sup>A</sup>   | 0/4 (0) <sup>A</sup>   | 0/4 (0) <sup>A</sup>   | 0/4 (0) <sup>A</sup>   | 0/24 (0) <sup>A</sup>    |
| 10 <sup>3</sup>             | 0/4 (0) <sup>A</sup>     | 0/4 (0) <sup>A</sup>   | 0/4 (0) <sup>A</sup>   | 0/4 (0) <sup>A</sup>   | 0/4 (0) <sup>A</sup>   | 0/4 (0) <sup>A</sup>   | 0/24 (0) <sup>A</sup>    |
| 10 <sup>5</sup>             | 3/4 (75) <sup>B</sup>    | 0/4 (0) <sup>A</sup>   | 3/24 (13) <sup>A</sup>   |
| 10 <sup>7</sup>             | 3/4 (75) <sup>B</sup>    | 3/4 (75) <sup>B</sup>  | 2/4 (50) <sup>AB</sup> | 3/4 (75) <sup>B</sup>  | 2/4 (50) <sup>AB</sup> | 2/4 (50) <sup>AB</sup> | 15/24 (63) <sup>B</sup>  |
| 10 <sup>9</sup>             | 4/4 (100) <sup>B</sup>   | 4/4 (100) <sup>B</sup> | 4/4 (100) <sup>B</sup> | 4/4 (100) <sup>B</sup> | 4/4 (100) <sup>B</sup> | 3/3 (100) <sup>B</sup> | 23/23 (100) <sup>C</sup> |
| <b>Non-pregnant animals</b> |                          |                        |                        |                        |                        |                        |                          |
| <b>Dose</b>                 | <b>PTD 1</b>             | <b>PTD 2</b>           | <b>PTD 3</b>           | <b>PTD 4</b>           | <b>PTD 5</b>           | <b>PTD 6</b>           | <b>Total</b>             |
| <b>(CFU)</b>                | <b>(%)<sup>a,b</sup></b> | <b>(%)<sup>a</sup></b> | <b>(%)<sup>a</sup></b> | <b>(%)<sup>a</sup></b> | <b>(%)<sup>a</sup></b> | <b>(%)<sup>a</sup></b> | <b>(%)<sup>a</sup></b>   |
| Control                     | 0/3 (0) <sup>A</sup>     | 0/3 (0) <sup>A</sup>   | 0/3 (0) <sup>A</sup>   | 0/3 (0) <sup>AB</sup>  | 0/3 (0) <sup>AB</sup>  | 0/3 (0) <sup>A</sup>   | 0/18 (0) <sup>A</sup>    |
| 10 <sup>5</sup>             | 0/6 (0) <sup>A</sup>     | 0/6 (0) <sup>A</sup>   | 0/6 (0) <sup>A</sup>   | 0/6 (0) <sup>B</sup>   | 0/6 (0) <sup>B</sup>   | 1/6 (17) <sup>AB</sup> | 1/36 (3) <sup>A</sup>    |
| 10 <sup>7</sup>             | 4/4 (100) <sup>B</sup>   | 3/4 (75) <sup>B</sup>  | 3/4 (75) <sup>B</sup>  | 2/4 (50) <sup>A</sup>  | 2/4 (50) <sup>A</sup>  | 3/4 (75) <sup>BC</sup> | 17/24 (71) <sup>B</sup>  |
| 10 <sup>9</sup>             | 5/5 (100) <sup>B</sup>   | 5/5 (100) <sup>B</sup> | 5/5 (100) <sup>B</sup> | 5/5 (100) <sup>C</sup> | 5/5 (100) <sup>C</sup> | 5/5 (100) <sup>C</sup> | 30/30 (100) <sup>C</sup> |

4

5 <sup>a</sup> Number of fecal samples positive through enrichment/total fecal samples collected (% positive)

6 <sup>b</sup> Dose groups that are significantly different from one another (p < 0.05) are denoted by different

7 letters; pregnant and non-pregnant dose groups are considered separately

8 Table S2. Isolation of *L. monocytogenes* in adult organs of pregnant and non-pregnant gerbils.

9

| <b>Pregnant animals</b>     |                          |                        |                        |                        |                        |                         |
|-----------------------------|--------------------------|------------------------|------------------------|------------------------|------------------------|-------------------------|
| <b>Dose</b>                 | <b>Intestine</b>         | <b>Liver</b>           | <b>Spleen</b>          | <b>Brain</b>           | <b>Gallbladder</b>     | <b>Total</b>            |
| <b>(CFU)</b>                | <b>(%)<sup>a,b</sup></b> | <b>(%)<sup>a</sup></b> | <b>(%)<sup>a</sup></b> | <b>(%)<sup>a</sup></b> | <b>(%)<sup>a</sup></b> | <b>(%)<sup>a</sup></b>  |
| Control                     | 0/4 (0) <sup>A</sup>     | 0/4 (0) <sup>A</sup>   | 0/4 (0) <sup>A</sup>   | 0/3 (0) <sup>A</sup>   | 0/3 (0) <sup>A</sup>   | 0/18 (0) <sup>A</sup>   |
| 10 <sup>3</sup>             | 0/4 (0) <sup>A</sup>     | 0/4 (0) <sup>A</sup>   | 0/4 (0) <sup>A</sup>   | 0/4 (0) <sup>A</sup>   | 0/4 (0) <sup>A</sup>   | 0/20 (0) <sup>A</sup>   |
| 10 <sup>5</sup>             | 0/4 (0) <sup>A</sup>     | 0/4 (0) <sup>A</sup>   | 0/4 (0) <sup>A</sup>   | 0/4 (0) <sup>A</sup>   | 0/3 (0) <sup>A</sup>   | 0/19 (0) <sup>A</sup>   |
| 10 <sup>7</sup>             | 2/4 (50) <sup>A</sup>    | 3/4 (75) <sup>B</sup>  | 2/4 (50) <sup>AB</sup> | 1/4 (25) <sup>A</sup>  | 1/4 (25) <sup>A</sup>  | 9/20 (45) <sup>B</sup>  |
| 10 <sup>9</sup>             | 4/4 (100) <sup>B</sup>   | 4/4 (100) <sup>B</sup> | 4/4 (100) <sup>B</sup> | 4/4 (100) <sup>B</sup> | 2/3 (66) <sup>A</sup>  | 18/19 (95) <sup>C</sup> |
| <b>Non-pregnant animals</b> |                          |                        |                        |                        |                        |                         |
| <b>Dose</b>                 | <b>Intestine</b>         | <b>Liver</b>           | <b>Spleen</b>          | <b>Brain</b>           | <b>Gallbladder</b>     | <b>Total</b>            |
| <b>(CFU)</b>                | <b>(%)<sup>a,b</sup></b> | <b>(%)<sup>a</sup></b> | <b>(%)<sup>a</sup></b> | <b>(%)<sup>a</sup></b> | <b>(%)<sup>a</sup></b> | <b>(%)<sup>a</sup></b>  |
| Control                     | 0/3 (0) <sup>AB</sup>    | 0/3 (0) <sup>A</sup>   | 0/3 (0) <sup>A</sup>   | 0/3 (0) <sup>AB</sup>  | 0/2 (0) <sup>A</sup>   | 0/14 (0) <sup>A</sup>   |
| 10 <sup>5</sup>             | 0/6 (0) <sup>A</sup>     | 1/6 (17) <sup>A</sup>  | 0/6 (0) <sup>A</sup>   | 0/6 (0) <sup>A</sup>   | 0/4 (0) <sup>A</sup>   | 1/28 (4) <sup>A</sup>   |
| 10 <sup>7</sup>             | 2/4 (50) <sup>AB</sup>   | 1/4 (25) <sup>A</sup>  | 1/4 (25) <sup>A</sup>  | 3/4 (75) <sup>B</sup>  | 1/4 (25) <sup>A</sup>  | 8/20 (40) <sup>B</sup>  |
| 10 <sup>9</sup>             | 4/5 (80) <sup>B</sup>    | 5/5 (100) <sup>B</sup> | 3/5 (60) <sup>A</sup>  | 1/5 (20) <sup>AB</sup> | 1/4 (25) <sup>A</sup>  | 14/24 (58) <sup>B</sup> |

10

11 <sup>a</sup> Number of tissue samples positive through enrichment/total tissue samples collected (%)

12 positive)

13 <sup>b</sup> Dose groups that are significantly different from one another (p < 0.05) are denoted by different

14 letters; pregnant and non-pregnant dose groups are considered separately
